# Supplementary material for: Underdiagnosis bias of artificial intelligence algorithms applied to chest radiographs in under-served patient populations
Source: PubMed Central journal article supplement (PMC8674135; doi:10.1038/s41591-021-01595-0), 2021-12-10
Supplement: 41591_2021_1595_MOESM1_ESM.pdf [file 41591_2021_1595_MOESM1_ESM.pdf]

---

**Supplementary information**

---

**Underdiagnosis bias of artificial intelligence algorithms applied to chest radiographs in under-served patient populations**

---

In the format provided by the authors and unedited

# Supplementary Materials for

## **Underdiagnosis bias of artificial intelligence algorithms applied to chest radiographs in under-served patient populations**

Laleh Seyyed-Kalantari<sup>1,2\*</sup>, Haoran Zhang<sup>3</sup>, Matthew B. A. McDermott<sup>3</sup>, Irene Y. Chen<sup>3</sup>,  
Marzyeh Ghassemi<sup>3</sup>

<sup>1</sup>University of Toronto.

<sup>2</sup>Vector Institute.

<sup>3</sup>Massachusetts Institute of Technology.

\*Correspondence to: laleh@cs.toronto.edu.

### **This PDF file includes:**

Table. S1 to S7

|            |      |     |       |      |       |      |       |      |      |     |
|------------|------|-----|-------|------|-------|------|-------|------|------|-----|
| <b>ALL</b> | 0-20 |     | 20-40 |      | 40-60 |      | 60-80 |      | 80-  |     |
| No Finding | 0    | 1   | 0     | 1    | 0     | 1    | 0     | 1    | 0    | 1   |
| Male       | 377  | 333 | 3679  | 2679 | 8550  | 4000 | 10163 | 2514 | 2720 | 269 |
| Female     | 198  | 481 | 2325  | 3011 | 6924  | 3951 | 7572  | 2065 | 2862 | 389 |
| <b>CXR</b> | 0-20 |     | 20-40 |      | 40-60 |      | 60-80 |      | 80-  |     |
| No Finding | 0    | 1   | 0     | 1    | 0     | 1    | 0     | 1    | 0    | 1   |
| Male       | 156  | 155 | 1838  | 1828 | 4371  | 2659 | 4876  | 1691 | 853  | 185 |
| Female     | 89   | 397 | 1222  | 2374 | 3816  | 2770 | 4130  | 1526 | 1163 | 316 |
| <b>CXP</b> | 0-20 |     | 20-40 |      | 40-60 |      | 60-80 |      | 80-  |     |
| No Finding | 0    | 1   | 0     | 1    | 0     | 1    | 0     | 1    | 0    | 1   |
| Male       | 103  | 28  | 1476  | 351  | 3550  | 490  | 4864  | 377  | 1849 | 71  |
| Female     | 82   | -   | 861   | 244  | 2400  | 396  | 3126  | 247  | 1680 | 65  |
| <b>NIH</b> | 0-20 |     | 20-40 |      | 40-60 |      | 60-80 |      | 80-  |     |
| No Finding | 0    | 1   | 0     | 1    | 0     | 1    | 0     | 1    | 0    | 1   |
| Male       | 118  | 150 | 373   | 504  | 626   | 869  | 422   | 441  | 26   | 16  |
| Female     | 27   | 70  | 234   | 389  | 711   | 767  | 317   | 297  | -    | -   |

**Table S1** The ALL, CXR, CXP, and NIH test set, images count in the intersection of sex-age. The numbers for subgroup with too few members ( $\leq 15$ ) are omitted.

|                   | <b>0-20</b> |          | <b>20-40</b> |          | <b>40-60</b> |          | <b>60-80</b> |          | <b>80-</b> |          |
|-------------------|-------------|----------|--------------|----------|--------------|----------|--------------|----------|------------|----------|
| <b>No Finding</b> | <b>0</b>    | <b>1</b> | <b>0</b>     | <b>1</b> | <b>0</b>     | <b>1</b> | <b>0</b>     | <b>1</b> | <b>0</b>   | <b>1</b> |
| <b>Medicare</b>   | 39          | -        | 263          | 312      | 2378         | 1232     | 4736         | 1339     | 1091       | 238      |
| <b>Other</b>      | 85          | 194      | 1447         | 1468     | 3153         | 1947     | 2270         | 825      | 410        | 103      |
| <b>Medicaid</b>   | -           | 29       | 359          | 496      | 920          | 495      | 265          | 93       | 33         | -        |
| <b>White</b>      | 108         | 145      | 930          | 1043     | 4278         | 2156     | 5143         | 1532     | 1159       | 260      |
| <b>Black</b>      | 19          | 46       | 617          | 783      | 1225         | 853      | 942          | 343      | 121        | 45       |
| <b>Hispanic</b>   | -           | -        | 315          | 306      | 399          | 347      | 268          | 118      | -          | -        |
| <b>Other</b>      | -           | -        | 70           | 64       | 230          | 157      | 364          | 119      | 55         | -        |
| <b>Asian</b>      | -           | 19       | 64           | 50       | 115          | 107      | 160          | 89       | 66         | -        |
| <b>Native</b>     | -           | -        | -            | -        | -            | -        | 30           | -        | -          | -        |

**Table S2:** The CXR test set, images count in the intersection of insurance-age and race/ethnicity-age subgroups. The numbers for subgroups with too few members ( $\leq 15$ ) are omitted.

|                   | <b>Medicare</b> |          | <b>Other</b> |          | <b>Medicaid</b> |          | <b>Male</b> |          | <b>Female</b> |          |
|-------------------|-----------------|----------|--------------|----------|-----------------|----------|-------------|----------|---------------|----------|
| <b>No Finding</b> | <b>0</b>        | <b>1</b> | <b>0</b>     | <b>1</b> | <b>0</b>        | <b>1</b> | <b>0</b>    | <b>1</b> | <b>0</b>      | <b>1</b> |
| <b>Male</b>       | 4526            | 1556     | 4232         | 2097     | 757             | 473      | -           | -        | -             | -        |
| <b>Female</b>     | 3981            | 1574     | 3133         | 2440     | 834             | 642      | -           | -        | -             | -        |
| <b>White</b>      | 6283            | 2181     | 4701         | 2548     | 633             | 398      | 6688        | 2717     | 4930          | 2419     |
| <b>Black</b>      | 1181            | 614      | 1276         | 1079     | 467             | 375      | 1152        | 659      | 1772          | 1411     |
| <b>Hispanic</b>   | 230             | 126      | 461          | 435      | 307             | 221      | 547         | 308      | 451           | 474      |
| <b>Other</b>      | 267             | 97       | 397          | 205      | 61              | 53       | 472         | 220      | 251           | 135      |
| <b>Asian</b>      | 122             | 41       | 195          | 174      | 90              | 52       | 225         | 116      | 182           | 151      |
| <b>Native</b>     | 30              | -        | -            | -        | -               | -        | 23          | -        | 18            | -        |

**Table S3:** The CXR test set, images count in the intersection of sex-insurance, insurance-race/ethnicity, and sex-race/ethnicity. The numbers for the intersections with too few members ( $\leq 15$ ) are omitted (e.g. Native with label 1).

|                                       | White Male    |             | White Female  |             | Black Male    |             | Black Female  |             |
|---------------------------------------|---------------|-------------|---------------|-------------|---------------|-------------|---------------|-------------|
|                                       | FP No Finding | Not Healthy | FP No Finding | Not Healthy | FP No Finding | Not Healthy | FP No Finding | Not Healthy |
| <b>Airspace Opacity</b>               | 22.5% ± 0.8%  | 34.3%       | 26.1% ± 1.1%  | 34.2%       | 19.4% ± 2.0%  | 31.6%       | 20.3% ± 1.0%  | 29.3%       |
| <b>Atelectasis</b>                    | 15.6% ± 1.0%  | 28.5%       | 17.8% ± 0.8%  | 29.3%       | 15.9% ± 1.3%  | 27.3%       | 16.3% ± 0.6%  | 23.4%       |
| <b>Cardiomegaly</b>                   | 18.0% ± 1.1%  | 28.6%       | 16.8% ± 1.2%  | 28.0%       | 19.0% ± 0.5%  | 32.7%       | 29.6% ± 1.1%  | 37.9%       |
| <b>Consolidation</b>                  | -             | 7.4%        | -             | 6.5%        | -             | 5.0%        | -             | 5.7%        |
| <b>Edema</b>                          | 3.9% ± 0.1%   | 17.7%       | 3.8% ± 0.1%   | 19.8%       | -             | 15.4%       | -             | 15.7%       |
| <b>Enlarged<br/>Cardiomediastinum</b> | 3.6% ± 0.2%   | 5.1%        | 3.6% ± 0.6%   | 4.3%        | -             | 3.6%        | -             | 3.2%        |
| <b>Fracture</b>                       | 5.9% ± 0.4%   | 3.5%        | 6.4% ± 0.4%   | 3.6%        | -             | 1.7%        | -             | 1.0%        |
| <b>Lung Lesion</b>                    | 5.2% ± 0.6%   | 3.8%        | 6.1% ± 0.8%   | 4.6%        | 10.3% ± 0.7%  | 5.6%        | 5.8% ± 0.5%   | 4.9%        |
| <b>Pleural Effusion</b>               | 5.5% ± 0.3%   | 35.0%       | 3.4% ± 0.4%   | 40.3%       | -             | 19.4%       | -             | 27.4%       |
| <b>Pleural Other</b>                  | -             | 2.1%        | -             | 1.2%        | -             | -           | -             | -           |
| <b>Pneumonia</b>                      | 7.6% ± 0.9%   | 10.4%       | 9.4% ± 0.6%   | 11.0%       | 9.1% ± 0.7%   | 10.6%       | 8.8% ± 0.9%   | 10.6%       |
| <b>Pneumothorax</b>                   | 2.3% ± 0.5%   | 6.2%        | -             | 4.7%        | -             | 2.8%        | -             | 4.2%        |

**Table S4:** The prevalence of different diseases for the four intersections of race and sex in the CXR test set for the subset of the population who do not have a positive label for ‘No Finding’ (“Not healthy”), and the subset of the “Not Healthy” population who we falsely predict to have no finding (shown as a 95% confidence interval over 5 models with different random seeds). Note that points corresponding to tasks where the subgroup contains less than 15 positively labeled patients are omitted from the table.

|                      | White Male | White Female | Black Male | Black Female |
|----------------------|------------|--------------|------------|--------------|
| <b>FP No Finding</b> | 1153 ± 63  | 823 ± 53     | 295 ± 11   | 512 ± 20     |
| <b>Not Healthy</b>   | 6688       | 4930         | 1152       | 1772         |

**Table S5:** Sample sizes for the cohorts described in Table S4 from the test set of MIMIC-CXR. The “Not healthy” group corresponds to the number of samples with No Finding = 0, and is shown as a point estimate from the test set. The “FP No Finding” group is the subset of the “Not healthy” group which our model falsely predicts to have No Finding = 1, and is shown as a 95% confidence intervals obtained over 5 models with different random seeds, each with a different size for the underdiagnosed population.

| Group    | CXR          | CXP          | NIH          | ALL          |
|----------|--------------|--------------|--------------|--------------|
| Male     | 33.6% ± 0.5% | 56.7% ± 0.7% | 29.8% ± 1.1% | 34.8% ± 0.7% |
| Female   | 29.4% ± 0.4% | 54.8% ± 0.8% | 30.3% ± 1.2% | 31.6% ± 0.6% |
| 80-      | 44.2% ± 0.8% | 67.9% ± 1.9% | 53.3% ± 3.3% | 46.8% ± 1.4% |
| 60-80    | 40.4% ± 0.5% | 63.7% ± 0.8% | 34.9% ± 1.6% | 41.1% ± 1.0% |
| 40-60    | 33.0% ± 0.4% | 55.2% ± 0.7% | 30.3% ± 0.8% | 34.4% ± 0.7% |
| 20-40    | 23.3% ± 0.4% | 49.1% ± 0.8% | 26.6% ± 1.2% | 26.1% ± 0.2% |
| 0-20     | 18.1% ± 0.6% | 50.0% ± 1.4% | 22.1% ± 1.0% | 20.2% ± 0.3% |
| White    | 34.0% ± 0.6% | N/A          | N/A          | N/A          |
| Native   | 42.0% ± 4.7% | N/A          | N/A          | N/A          |
| Other    | 31.0% ± 0.8% | N/A          | N/A          | N/A          |
| Asian    | 27.6% ± 0.5% | N/A          | N/A          | N/A          |
| Hispanic | 29.5% ± 0.7% | N/A          | N/A          | N/A          |
| Black    | 31.9% ± 0.3% | N/A          | N/A          | N/A          |
| Other    | 29.1% ± 0.4% | N/A          | N/A          | N/A          |
| Medicaid | 31.9% ± 0.6% | N/A          | N/A          | N/A          |

**Table S6:** False discovery rates (FDR) for the “No Finding” label for MIMIC-CXR (CXR), CheXpert (CXP), and Chest-Xray14 (NIH) as well as the multi-source ALL dataset.

| Dataset | Ours        | (19)  | (20)  | (21) | (22)  |
|---------|-------------|-------|-------|------|-------|
| CXR     | 0.834±0.001 | 0.830 | 0.830 | 0.83 | --    |
| CXP     | 0.805±0.001 | --    | --    | 0.80 | 0.807 |
| NIH     | 0.835±0.002 | --    | --    | --   | 0.87  |

**Table S7:** The comparison of our average AUC over all labels with the state of the art (SOTA) models.
